# 1 **Implicit Bias And Unintentional Harm In Vascular Care: The Case For Intervention**

2

3 Cover title: Bias and Harm in Vascular Care

4

5 Corey A. Kalbaugh, PhD, MS, FAHA<sup>1</sup>; Erika T. Beidelman, MPH<sup>1</sup>; Kerry A. Howard, PhD,  
6 MS<sup>2,3</sup>; Brian Witrick, PhD, MPH<sup>2</sup>; Ashley Clark, MS<sup>4</sup>; Katharine L. McGinagle, MD, MPH<sup>5</sup>;  
7 Samantha Minc, MD, MPH<sup>6</sup>; Olamide Alabi, MD, MS<sup>7</sup>; Caitlin W. Hicks, MD, MS<sup>8</sup>; Andrew A.  
8 Gonzalez, MD, JD, MPH<sup>9,10</sup>; Crystal W. Cené, MD, MPH<sup>11</sup>; Samuel Cykert, MD<sup>12</sup>

9

10 <sup>1</sup>Department of Epidemiology and Biostatistics, Indiana University School of Public Health-  
11 Bloomington, Bloomington, IN

12 <sup>2</sup>Department of Public Health Sciences, Clemson University, Clemson, SC

13 <sup>3</sup>Center for Public Health Modeling and Response, Clemson University, Clemson, SC

14 <sup>4</sup>Center for Survey Research and O’Neill School of Public and Environmental Affairs, Indiana  
15 University-Bloomington, Bloomington, IN

16 <sup>5</sup>Department of Surgery, School of Medicine, The University of North Carolina at Chapel Hill,  
17 Chapel Hill NC

18 <sup>6</sup>Department of Cardiovascular and Thoracic Surgery, West Virginia School of Medicine,  
19 Morgantown, WV

20 <sup>7</sup>Department of Surgery, Emory University School of Medicine, Atlanta, GA

21 <sup>8</sup>Department of Surgery, Johns Hopkins University School of Medicine, Baltimore, MD

22 <sup>9</sup>Department of Surgery, School of Medicine, Indiana University School of Medicine;  
23 Indianapolis, IN;

24 <sup>10</sup>Center for Health Services Research, Regenstrief Institute

25 <sup>11</sup>Department of Medicine, University of California at San Diego Health, La Jolla, CA

26 <sup>12</sup>Division of General Medicine and Clinical Epidemiology, School of Medicine, The University  
27 of North Carolina at Chapel Hill, Chapel Hill NC

28

29 Corresponding Author:

30 Corey A. Kalbaugh

31 1025 E. 7<sup>th</sup> Street, 025E

32 Phone: (812) 855-3117 ; Fax: (812) 855-4983

33 Email: ckalbaug@iu.edu

34 Word count:

35 Keywords: implicit bias; unconscious bias; explicit bias; peripheral artery disease; quality of  
36 care; health disparities; health equity

37 Disclosures. None

38 **ABSTRACT**

39

40 **Introduction.** Implicit (or unconscious) bias may influence physician treatment decisions and  
41 contribute to Black-White health disparities. While implicit bias has been linked with low quality  
42 care via clinical vignettes, some worry that these studies are not representative of the ‘real  
43 world.’ There is limited data that has attempted to link implicit bias with actual care delivery and  
44 outcomes. We sought to understand if implicit bias is associated with potentially harmful  
45 surgical treatment selection in a cohort of patients with peripheral artery disease (PAD)-related  
46 claudication undergoing below-knee lower extremity revascularization as captured in a ‘real  
47 world’ procedural registry.

48 **Methods.** We invited vascular specialists from the Vascular Quality Initiative (VQI) to take the  
49 race Implicit Association Test (IAT). The IAT asks participants to associate images of Black and  
50 White Americans with either positive or negative attributes. Based on reaction time differences  
51 across sequential tests, participants were grouped into race-based implicit bias categories: pro-  
52 White bias, no bias, or pro-Black bias. Our provider-level implicit bias results were linked to  
53 patient-level registry data of peripheral revascularization procedures performed for claudication.  
54 We measured the adjusted odds of performance of below knee procedures by specialist implicit  
55 bias and patient race via mixed effects logistic regression models. We assessed implicit bias as a  
56 moderator of the association of below-knee procedures and patient race with 1-yr amputation.

57 **Results.** 218 vascular specialists in the United States completed the IAT and 157 (72%) had a  
58 pro-White bias. Black patients treated by a physician with pro-White bias had a 74% increase in  
59 the odds of receiving a below-knee procedure compared to the total sample (aOR: 1.74, 95% CI:  
60 1.33-2.15). When treated by a specialist with pro-White bias, Black patients had 3 times the odds  
61 of 1-yr amputation – regardless of anatomic location treated – compared to White patients (aOR:  
62 3.04, 95% CI: 1.68-5.51). Conversely, Black patients treated by a specialist with no bias had  
63 similar odds of a below-knee procedure (aOR: 0.99, 95% CI: 0.67-1.30) and 1-year amputation  
64 (aOR: 1.31, 95% CI: 0.35-4.96) as the full patient sample.

65 **Conclusions.** Implicit bias is associated with potentially harmful below-knee procedures for  
66 Black patients and contributes to Black-White outcome disparities in the United States. These  
67 results suggest the need for system-level interventions that transparently identify and warn of  
68 procedures not aligned with best practices to reduce the negative effect of implicit bias.

69

70

71 **Clinical Perspective.**

72 What is new?

- 73 • Pro-White bias is associated with low-value care for Black patients.
- 74 • Black patients treated by physicians with pro-White implicit preferences also had worse
- 75 1-year amputation rates.
- 76 • We found little race-based variation in treatment decisions for below-knee
- 77 revascularization procedures among physicians with no implicit bias as measured by the
- 78 IAT.

79

80 What are the clinical implications?

- 81 • Physicians who treat vascular diseases consider their own practices and where they may
- 82 be falling short of standards, particularly for their Black patients.
- 83 • Health care leaders must begin to evaluate how and why their own health care systems
- 84 make it possible for practitioners' unconscious biases to negatively impact care.
- 85 • Policy changes that enhance payment for evidence-based procedures and reduce payment
- 86 for potentially harmful procedures should be considered.

87

## 88 INTRODUCTION

89 Nearly ten million people in the United States have claudication, a subtype of peripheral artery  
90 disease (PAD) characterized by exercise-induced pain or fatigue in the lower extremities.<sup>1</sup>  
91 Claudication can cause severe lifestyle limitations and may progress to premature functional  
92 impairment and death.<sup>2</sup> More than a decade's worth of research has shown worse outcomes for  
93 Black patients with claudication compared to White patients with claudication.<sup>3</sup> The reasons  
94 behind the persistence of these inequities remain poorly described. We have examined how the  
95 clinical management of patients with claudication differs by patient race and the role this  
96 differential management plays in Black-White health inequities. Black patients are less likely to  
97 be offered a limb salvage attempt prior to amputation in situations where limb vitality is  
98 threatened.<sup>4-6</sup> Black patients are also less likely to be offered guideline-directed medical therapy  
99 than their White counterparts.<sup>7</sup> Additionally, Black individuals residing in low-income counties  
100 are significantly more likely to undergo early and potentially harmful below-knee peripheral  
101 revascularizations for claudication compared to similar White individuals<sup>8,9</sup>. Black individuals  
102 with PAD in non-distressed communities have a higher lifetime incidence of amputation  
103 compared to White individuals in distressed communities.<sup>10</sup> A better understanding of the  
104 mechanisms that underlie these racial inequities in both potentially harmful revascularizations  
105 and limb loss is necessary to ultimately provide better care and improved outcomes.

106  
107 So *why* do Black patients receive different and suboptimal care compared to White patients even  
108 when controlling for location, insurance, socioeconomic status (SES), and risk factor profiles?  
109 One potential mechanism contributing to care inequities is implicit bias, defined as an  
110 unconscious bias that may influence behavior, cognitive processes, and decision-making.<sup>11</sup> As  
111 described in several recent systematic reviews, health care providers have implicit biases and that  
112 may impact the delivery of health care in a variety of settings.<sup>12-14</sup> For example, physician bias  
113 and stereotyping may have an influence on who receives the “best” health care interventions and  
114 who receives harmful care even if unintentional.<sup>15,16</sup> However, while implicit bias has been  
115 linked with low quality care in the setting of clinical vignettes,<sup>17</sup> these studies have been  
116 critiqued as lacking the stressors present in a “real-life” clinical environment.<sup>12</sup> Conversely,  
117 implicit bias tests are able to more directly measure the unconscious association through reaction  
118 time. There is a paucity of data exploring the relationship between implicit bias among  
119 physicians with actual care delivery and related outcomes.

120  
121 The purpose of our study was to examine if physician implicit bias is associated with the  
122 provision of low-value care for Black or White patients with claudication, among a sample of  
123 vascular specialists using the implicit association test (IAT)<sup>18</sup>. We defined low-value care as the  
124 performance of below-knee peripheral revascularization procedures. We also assessed the  
125 association between below-knee procedures and patient race on the odds of a 1-year amputation,  
126 using physician implicit bias as a moderator.

## 127 **METHODS**

### 128 *Study Sample and Source Population*

129 The Society for Vascular Surgery (SVS) Vascular Quality Initiative (VQI) is a vascular  
130 procedure-based registry<sup>19</sup> intended to document and improve the quality of care delivered to  
131 patients with vascular diseases. Clinicians that participate in the delivery of vascular care in the  
132 United States are eligible to participate in the VQI. As of January 2023, the VQI includes 960  
133 sites. The VQI has 18 regional quality groups within four regions: South (5), Northeast (4),  
134 Midwest (4), and West (5). Centers include academic medical centers, teaching hospitals,  
135 community hospitals, and private practices. We invited all vascular specialist VQI members  
136 (N=2,512) to take the race Implicit Association Test (IAT) to categorize their implicit bias level.  
137 We then linked the IAT to procedure-level data from the VQI registry. The registry contains  
138 information on patient demographics, comorbid conditions, imaging studies, medication usage,  
139 peri-procedural details, and in-hospital and thirty-day outcomes. Patients also are expected to  
140 complete a one-year follow-up visit for any procedure covered by the VQI and outcome data at  
141 one-year are included in the registry. The Social Security Death Index is linked to the VQI  
142 registry to ascertain deaths. We restricted the procedure-level dataset to observations linked to  
143 only White or Black patients as the race IAT only measures implicit bias in relation to White or  
144 Black individuals.

145

### 146 *Exposure: Implicit Bias*

147 The IAT is an online assessment that takes 10 to 15 minutes to complete and asks participants to  
148 associate images of White and Black individuals with either positive or negative attributes. It is  
149 the most widely used test for studying unconscious bias in scientific research with established  
150 acceptable levels of reliability and validity.<sup>18,20</sup> Based on the differences in reaction times across  
151 sequential tests, participants were grouped into seven implicit bias categories based on racial  
152 preference: Strong pro-White bias, moderate pro-White bias, slight pro-White bias, no bias,  
153 slight pro-Black bias, moderate pro-Black bias, and strong pro-Black bias. We then further  
154 reduced this categorical variable into the following three levels due to low within-category  
155 sample sizes: pro-White bias, no bias, and pro-Black bias.

156

### 157 *Primary Outcome: Risk>Benefit Procedures*

158 To test the association between physician implicit bias and procedure performance, we assessed  
159 the outcome of below the knee procedures for claudication because these have been identified as  
160 carrying high risk with questionable benefit.<sup>21,22</sup> We defined below-knee as arteries inclusive of  
161 the below-knee popliteal and arteries more distal (tibial, pedal, etc). Because these procedures  
162 often lead to major adverse vascular events, we used this as our primary outcome.<sup>23</sup> Performance  
163 of a below-knee procedure was represented by a binary indicator variable with '1' indicating the  
164 procedure was performed and '0' indicating it was not.

165

### 166 *Secondary Outcome: 1-Year Amputation*

167 The VQI registry longitudinally follows and records patient outcomes following each procedure  
168 including instances of major amputation. Therefore, we examined the rates of major amputation  
169 within 1-year of recorded procedure. We used the date of the procedure and the date of  
170 amputation to determine amputations that occurred within the year following the procedure.  
171 Minor amputations were not included in analyses.

172

173 *Covariates*

174 Both physician-level and procedure-level covariates were included in our analysis to describe the  
175 sample and account for confounding. Physician-level characteristics included age (years), gender  
176 (male or female), specialty (cardiothoracic surgery, interventional cardiology, interventional  
177 radiology, or vascular surgery), years of experience (0-2 years, 3-5 years, 6-10 years, 11-15  
178 years, 16-20 years, 21-25 years, or 26+ years), race/ethnicity (non-Hispanic white, non-Hispanic  
179 black, non-Hispanic other, or Hispanic), and region (Midwest, Northeast, South, or West).  
180 Procedure-level characteristics included year of procedure, anatomic location of the intervention,  
181 type of intervention (endovascular or open bypass), patient age, gender, diabetes status, current  
182 smoking status (yes or no), body-mass index, and patient race (non-Hispanic white or non-  
183 Hispanic black).

184

185 *Statistical Analysis*

186 To reduce the potential effect of differences in the characteristics of physicians from the SVS  
187 VQI registry who participated compared to the full registry, data were weighted. First, we cross-  
188 classified physicians into categories (or “weighting cells”) based on the following three  
189 variables: US geographic region, age category, and sex, due to differences in the likelihood of  
190 participating in the study (for example, physicians who identified as female were more likely to  
191 participate). Then, a weight defined as the number of physicians on the registry divided by the  
192 number of physicians who participated in the study was applied within each “weighting cell”  
193 (e.g., male physicians 30-44 years of age from the Northeast region of the United States) to  
194 “weight up” physicians from demographic groups who were underrepresented in the data.  
195 Analyses presented here account for weighting.

196

197 We then performed univariate descriptive analyses to characterize the physicians and procedures  
198 included in our analytical sample. We compared the distribution of physician-level  
199 sociodemographic characteristics across the three identified implicit bias categories. To answer  
200 our research questions, we restricted our dataset to procedures linked to patients that presented  
201 with claudication. To assess the association between physician implicit bias and the performance  
202 of below knee procedures among patients with claudication, we fit mixed effects logistic  
203 regression models. With these models we estimated the odds of a below knee procedure being  
204 performed associated within each physician implicit bias category. All models included a random  
205 intercept for the physician to account for correlation between multiple procedures performed by  
206 the same physician. Additionally, all models included an interaction between physician implicit  
207 bias category and patient race. We included this interaction term as we anticipated that the  
208 association between implicit bias and procedure performance would vary based on patient  
209 race/ethnicity. We also report interaction contrasts for the adjusted model. Ultimately, we  
210 reduced our exposure categorization to two levels (No Bias/pro-Black bias versus Pro-White  
211 Bias) due to non-convergence of models that included the pro-Black bias group. This is due to  
212 the low sample size within the pro-Black bias exposure group.

213

214 We also assessed the association between both below-knee procedures and patient race on the  
215 odds of a 1-year amputation, using physician implicit bias as a moderator. We estimated all  
216 associations via mixed effects models with a random intercept for the physician to account for  
217 the correlation between procedures performed by the same physician. To assess moderation by  
218 physician implicit bias, we stratified our analysis by the three levels of implicit bias. Due to

219 insufficient sample size, we could not fit a model for the Black implicit bias preference category  
220 in the model assessing the association between the performance of below knee procedures and  
221 the odds of a 1-year amputation. All statistical analyses were performed in RStudio version 4.1.1  
222 and the mixed effects models were fit using the lme4 package.<sup>24</sup>

223

## 224 **RESULTS**

### 225 *Sample Vascular Specialists Characteristics*

226 We had 218 vascular specialists that met inclusion criteria of 1) completing the entire IAT survey  
227 and 2) were able to be linked to procedural-level data in the VQI registries. The majority of  
228 physician participants were vascular surgeons (91%), non-Hispanic White (66%), and male  
229 (74%) (*Table 1*). Non-white physicians included non-Hispanic Black (n=10), Hispanic (n=9),  
230 non-Hispanic Other (n=55) (including physicians identifying as multiracial, Asian, American  
231 Indian/Alaska Native, Native Hawaiian, Other Pacific Islander, and Other). The median age of  
232 participants was 46 years and median years of practice was 6-10 years.

233

### 234 *Sample Patient Characteristics*

235 Our 218 vascular specialists were linkable to 6,588 patients on whom they performed a  
236 peripheral revascularization procedure for claudication. The majority of the procedures were  
237 endovascular (n=4947; 75%). There were 880 below-knee procedures and Black patients had a  
238 higher prevalence of these procedures than White patients (19% v 13%). Compared to White  
239 patients, Black patients were younger, more likely to be female, and had a higher prevalence of  
240 current smoking status and diabetes (*Table 2*).

241

### 242 *Physician Implicit Bias*

243 Based on the results of the IAT, we found that 72% of vascular specialists had a pro-White bias,  
244 17% had no specific preference for Black or White individuals, and 11% had a pro-Black bias.  
245 Of the 157 specialists with a pro-White bias, 39 were found to have a slight bias, 70 had a  
246 moderate bias, and 48 had a strong bias for White compared to Black individuals. Of the 23  
247 specialists with a pro-Black bias, 10 were found to have a slight bias, 10 had a moderate bias,  
248 and 3 had a strong bias for Black compared to White individuals.

249

### 250 *Physician Implicit Bias and Below-Knee Procedures*

251 From an adjusted model, we found a significant interaction between physician pro-White bias  
252 and patient race on the odds of a below-knee procedure among patients with claudication (aOR:  
253 1.59, 95% CI: 1.02-2.49) (see *Table 3*). Black patients treated by a physician with pro-White bias  
254 had a 74% increase in the odds of receiving a below-knee procedure compared to the total  
255 sample (aOR: 1.74, 95% CI: 1.33-2.15) (see *Figure 1*). In contrast, White patients treated by both  
256 physicians with pro-White bias or no bias had a 19% and 28% reduced odds of a below-knee  
257 procedure, respectively, compared to the sample (Physician with pro-White bias aOR: 0.81, 95%  
258 CI: 0.64-0.97; Physician with no bias aOR: 0.72, 95% CI: 0.56-0.89).

259

### 260 *1-Year Incidence of Major Amputation*

261 The overall one-year incidence of major amputation was 1.10 (0.77,1.30) in our overall  
262 population of patients treated for claudication. Incidence of amputation was higher among Black  
263 patients compared to White patients (1.94% v 0.81%; aHR: 2.14, 95% CI: 1.23, 3.72).

264

265 *1-Year Amputation and Physician Implicit Bias as a Moderator*

266 Among patients treated by a physician with no racial bias, patient race was not associated with  
267 the odds of 1-year amputation (aOR: 1.31, 95% CI: 0.35-4.96) (see *Table 4*). Among patients  
268 treated by physicians with a pro-White bias, Black patients had 3.3 times the odds of  
269 experiencing an amputation within 1-year of the procedure compared to White patients (aOR:  
270 3.26, 95% CI: 1.80-5.90). Among patients treated by a physician with no racial bias, patients  
271 receiving a below-knee procedure had 4.5 times the odds of experiencing an amputation within  
272 1-year compared to above-knee procedures (aOR: 4.47, 95% CI: 1.63-12.21) (see *Table 5*).  
273 Among patients treated by a physician with a pro-White bias, patients receiving a below-knee  
274 procedure had 7 times the odds of experiencing an amputation within 1-year compared to above-  
275 knee procedures (aOR: 6.99, 95% CI: 3.91-12.50).

276

277 **DISCUSSION**

278 This study sought to identify whether pro-White implicit bias was associated with the delivery of  
279 low-value care to Black patients among a sample of vascular specialists. We found a high  
280 prevalence of pro-White implicit bias among our sample of physicians who were treating  
281 patients with claudication. Additionally, we found little race-based variation in treatment  
282 decisions for below-knee revascularization procedures among physicians with no implicit bias as  
283 measured by the IAT. In contrast, physicians with pro-White bias were more likely to perform a  
284 below-knee procedure on their Black patients compared to White patients. Black patients treated  
285 by physicians with pro-White implicit preferences also had worse 1-year amputation rates.

286

287 The influence of implicit bias on clinical decision-making has been examined as a potential  
288 contributor to health inequities. However, most prior work has utilized indirect comparisons of  
289 patient-provider communication<sup>25,26</sup> and mock clinical vignettes presented to clinicians.<sup>17,27</sup> To  
290 our knowledge, the present study is the first to link formal implicit bias evaluations with real  
291 world care delivery and clinical outcomes data. Our overall IAT preference findings are similar  
292 to what has been documented for the general population and in other health care fields.<sup>27,28</sup> We  
293 found that pro-White implicit bias was present in the majority of our sample of vascular  
294 specialists. Fewer than one in five specialists had a ‘no bias’ result on our standardized IAT. We  
295 want to highlight that specialists with no racial bias were less likely to perform a low-value  
296 procedure on either their Black or White patients and had the least treatment variability between  
297 their Black and White patients. Finally, when these specialists *did* choose to perform a low-value,  
298 below-knee procedure, they appear to have selected the appropriate patients who may derive  
299 benefit. Regardless of patient race, patients treated with a low-value procedure by a physician  
300 with no preference were less likely to experience a limb amputation within one year.

301

302 Two aspects of our findings are particularly concerning. First is that the use of invasive below  
303 the knee procedures for both White and Black patients is more prevalent than current guidelines  
304 would support. For example, following the Society for Vascular Surgery Appropriate Use  
305 Criteria<sup>21</sup> (AUC) guidelines is important because natural history studies suggest that three-  
306 fourths of people with claudication can be medically managed without experiencing significant  
307 symptom progression resulting in chronic limb threatening ischemia (CLTI) in their lifetime.<sup>29</sup>  
308 The risk of major lower extremity amputation for people with claudication is 1-2% over 5 years  
309 when medically optimized.<sup>30</sup> Still, the US has seen a rapid increase in the surgical management  
310 of claudication.<sup>31</sup> Based on Medicare claims data, the number of PVI performed for claudication



311 increased by nearly 1,000 procedures per year between 2011 and 2019, going from 48,778 to  
312 56,783 annually.<sup>32</sup> Furthermore, the use of below the knee peripheral revascularizations has  
313 expanded in recent years. Patients undergoing bypass surgery for below-knee arteries have more  
314 than double the risk of amputation compared to patients with an above-knee procedure. Patients  
315 undergoing infrapopliteal PVI have at least a 2x greater risk of limb loss at one year compared to  
316 natural history estimates.<sup>21</sup> Therefore, the use of low value care, and, in some cases, limb-risking  
317 care, is on the rise for everyone.

318  
319 The majority of the population has some form of implicit bias. Thus, there is no surprise in  
320 finding a high proportion of physicians with pro-white implicit bias.<sup>12</sup> However, the second  
321 concern is the potential for unconscious biases to impact care based on patient race. The findings  
322 from our study showed that the tendency toward below the knee procedures is more prevalent in  
323 Black patients, especially those cared for by specialists with a pro-White implicit bias. Any  
324 intervention for claudication is considered a third-line therapy intended only after failure of  
325 aggressive medical optimization via first-line treatment including antiplatelet agents, statin,  
326 smoking cessation, and supervised exercise therapy and second line therapy including a  
327 phosphodiesterase III inhibitor (i.e., cilostazol).<sup>33</sup> However, the use of a below the knee  
328 intervention, and especially those to infrapopliteal arteries, to treat claudication is explicitly  
329 discouraged.<sup>21</sup> It is not concerning, in itself, that the IAT results among these clinicians parallel  
330 those of the general population and other healthcare fields; however, it is concerning that the  
331 output is associated with more instances of potentially harmful care ultimately leading to  
332 documented limb amputation. Our moderation analysis provides early evidence that these higher  
333 rates of amputation documented among Black patients with PAD, both in our research and  
334 research by other scholars, is partially explained via physician implicit bias and its impact on  
335 treatment decisions for Black patients. Notably, we found that physician implicit bias compounds  
336 with the negative effect of below-knee procedures to put Black patients at significantly higher  
337 risk of 1-year amputations. Though below-knee procedures for revascularization are associated  
338 with higher amputation rates among both Black and White patients, Black patients with a  
339 physician with pro-White bias are far more likely to have this procedure type selected.

340  
341 In examining the overall picture, how can we move forward with these results? Notably, the IAT  
342 measures implicit bias<sup>12</sup> and not any overt racism or malintent. Still, whatever the processes are  
343 that lead to care differences must be mitigated. The stakes are high when physicians who make  
344 limb and life decisions for people have biases that adversely affect people's lives. There is a  
345 precedent to follow via a multi-level intervention that mitigated Black-White disparities in  
346 completion of treatment and outcomes for early-stage breast and lung cancer.<sup>34,35</sup> The first  
347 component was real time transparency through an electronic health record derived  
348 registry/warning system that alerted clinical teams to not only missed patient appointments but  
349 missed expected milestones in care, the latter process identifying clinical inertia. The second  
350 component was accountability where clinical teams were presented their quarterly data on  
351 treatment completion according to race and would brainstorm on reversible barriers leading to  
352 these differences. The third component was enhanced communication through a navigator that  
353 would ensure timely and clear communication with patients and advocacy for the patient with the  
354 clinical team. Compared to both historical and concurrent controls, this system-based  
355 intervention not only reduced substantial Black-White gaps in cancer care completion but, also  
356 significantly increased care completion for White patients.<sup>34</sup> Potentially, similar informatics

357 support, audit and feedback, and enhanced communication could optimize care for all in the  
358 realm of vascular disease by formally implementing maximal medical care and highlighting  
359 optimal procedure use.

360  
361 Our study has limitations and strengths that are important to discuss. There has long been an  
362 ongoing debate over the use of the IAT to measure implicit bias.<sup>36,37</sup> However, the IAT remains  
363 the most widely used test for studying unconscious bias with good reliability and validity.<sup>20</sup>  
364 Additionally, a limitation of the VQI is that we have no information about the decision to  
365 perform a revascularization instead of (continued) medical management for the patients in our  
366 study. Thus, we do not know why the decision was made to perform a surgery. It is difficult to  
367 know if the specialists that participate in the VQI are representative of all US-based vascular  
368 specialists. Our broader study population only included specialists that participate in the VQI.  
369 Further, this analysis reflects only those specialists that were linkable to one or more of the lower  
370 extremity modules within the VQI. As such, our analytic sample is a smaller sample of  
371 participants in our broader study (n=337) and an even smaller sample of our overall frame  
372 (n=2512). Further, our sample included more women, younger specialists, and fewer from the  
373 Midwest than the overall frame. Because we anticipated the aforementioned challenges, we were  
374 able to compare our sample to the overall frame and provide weighting to account for non-  
375 response and demographic differences. Thus, we still have the ability to make inferences to the  
376 broader VQI interventionalist population. And, to our knowledge, this is the largest survey of  
377 implicit bias among vascular providers and the only study to link the implicit bias score of an  
378 interventionalist to actual clinical care and outcomes. Thus, our study represents an important  
379 step forward in understanding the important role that unconscious bias plays in the delivery of  
380 low-value care to vascular patients. Instead of documenting disparities, our study indicates the  
381 role of unconscious bias as a potential mechanism behind vascular disparities.

## 382 383 **CONCLUSIONS**

384 We provide evidence that implicit bias affects many vascular clinicians that treat PAD, and this  
385 implicit bias is associated with increased delivery of low-value, potentially harmful care for  
386 Black patients. This bias, while unintentional, when paired with low-value care, is further  
387 associated with poor outcomes. To take the necessary step of mitigating these inequities, we  
388 recommend system-level interventions that provide transparency and accountability through real  
389 time digital warnings and race-specific quality improvement. We also recommend policy changes  
390 that enhance payment for evidence-based procedures and reduce payment for potentially harmful  
391 procedures. Such payments for value-based care could include bonuses for achieving care  
392 excellence and equity instead of the fee-for-service model that may encourage utilization of  
393 procedures like the below-knee interventions for claudication described in our study.

394

395 **REFERENCES**

396

- 397 1. Dua A, Gologorsky R, Savage D, Rens N, Gandhi N, Brooke B, Corriere M, Jackson E,  
398 Aalami O. National assessment of availability, awareness, and utilization of supervised  
399 exercise therapy for peripheral artery disease patients with intermittent claudication. *J*  
400 *Vasc Surg*. 2020;71:1702-1707. doi: 10.1016/j.jvs.2019.08.238
- 401 2. Criqui MH, Matsushita K, Aboyans V, Hess CN, Hicks CW, Kwan TW, McDermott MM,  
402 Misra S, Ujueta F, American Heart Association Council on E, et al. Lower Extremity  
403 Peripheral Artery Disease: Contemporary Epidemiology, Management Gaps, and Future  
404 Directions: A Scientific Statement From the American Heart Association. *Circulation*.  
405 2021;144:e171-e191. doi: 10.1161/CIR.0000000000001005
- 406 3. Newhall K, Spangler E, Dzebisashvili N, Goodman DC, Goodney P. Amputation Rates for  
407 Patients with Diabetes and Peripheral Arterial Disease: The Effects of Race and Region.  
408 *Ann Vasc Surg*. 2016;30:292-298 e291. doi: 10.1016/j.avsg.2015.07.040
- 409 4. Holman KH, Henke PK, Dimick JB, Birkmeyer JD. Racial disparities in the use of  
410 revascularization before leg amputation in Medicare patients. *J Vasc Surg*. 2011;54:420-  
411 426.
- 412 5. Durazzo TS, Frencher S, Gusberg R. Influence of race on the management of lower  
413 extremity ischemia: revascularization vs amputation. *JAMA Surg*. 2013;148:617-623. doi:  
414 10.1001/jamasurg.2013.1436
- 415 6. Hughes K, Seetahal S, Oyetunji T, Rose D, Greene W, Chang D, Cornwell E, Obisesan T.  
416 Racial/ethnic disparities in amputation and revascularization: a nationwide inpatient  
417 sample study. *Vascular and endovascular surgery*. 2014;48:34-37.
- 418 7. Kalbaugh CA WB, Howard KA, Sivaraj LB, McGinagle KL, Cykert S, Robinson III WP, Hicks  
419 CW, Lesko CR. The contribution of sub-optimal prescription of preoperative antiplatelets  
420 and statins to race and ethnicity-related disparities in major limb amputation. *Vascular*  
421 *Medicine*.
- 422 8. Hicks CW, Wang P, Bruhn WE, Abularrage CJ, Lum YW, Perler BA, Black JH, 3rd, Makary  
423 MA. Race and socioeconomic differences associated with endovascular peripheral  
424 vascular interventions for newly diagnosed claudication. *J Vasc Surg*. 2020;72:611-621  
425 e615. doi: 10.1016/j.jvs.2019.10.075
- 426 9. Kalbaugh CA, Witrick B, Howard KA, McGinagle KL, Lesko CR. Abstract P105: Bypasses To  
427 Below-Knee Arteries May Expedite Amputation In Patients With Claudication.  
428 *Circulation*. 2022;145:AP105-AP105.
- 429 10. Witrick B, Shi L, Mayo R, Hendricks B, Kalbaugh CA. The association between  
430 socioeconomic distress communities index and amputation among patients with  
431 peripheral artery disease. *Front Cardiovasc Med*. 2022;9:1021692. doi:  
432 10.3389/fcvm.2022.1021692
- 433 11. Greenwald A, Banaji MR. Implicit Social Cognition: Attitudes, Self-Esteem, and  
434 Stereotypes. *Psychological Review*. 1995;102:4-27.
- 435 12. Maina IW, Belton TD, Ginzberg S, Singh A, Johnson TJ. A decade of studying implicit  
436 racial/ethnic bias in healthcare providers using the implicit association test. *Soc Sci Med*.  
437 2018;199:219-229. doi: 10.1016/j.socscimed.2017.05.009

- 438 13. FitzGerald C, Hurst S. Implicit bias in healthcare professionals: a systematic review. *BMC*  
439 *Med Ethics*. 2017;18:19. doi: 10.1186/s12910-017-0179-8
- 440 14. Dehon E, Weiss N, Jones J, Faulconer W, Hinton E, Sterling S. A Systematic Review of the  
441 Impact of Physician Implicit Racial Bias on Clinical Decision Making. *Acad Emerg Med*.  
442 2017;24:895-904. doi: 10.1111/acem.13214
- 443 15. Van Ryn M, Burke J. The effect of patient race and socio-economic status on physicians'  
444 perceptions of patients. *Social science & medicine* 2000;50:813-828.
- 445 16. Schulman KA, Berlin JA, Harless W, Kerner JF, Sistrunk S, Gersh BJ, Dubé R, Taleghani CK,  
446 Burke JE, Williams S, et al. The effect of race and sex on physicians' recommendations for  
447 cardiac catheterization. *N Engl J Med*. 1999;340:618-626. doi:  
448 10.1056/nejm199902253400806
- 449 17. Green AR, Carney DR, Pallin DJ, Ngo LH, Raymond KL, Iezzoni LI, Banaji MR. Implicit bias  
450 among physicians and its prediction of thrombolysis decisions for black and white  
451 patients. *J Gen Intern Med*. 2007;22:1231-1238. doi: 10.1007/s11606-007-0258-5
- 452 18. Greenwald A, McGhee D, Schwarz J. Measuring individual differences in implicit  
453 cognition: the implicit association test. *J Pers Soc Psychol*. 1998;74:1464-1480.
- 454 19. Cronenwett JL, Kraiss LW, Cambria RP. The Society for Vascular Surgery Vascular Quality  
455 Initiative. *J Vasc Surg*. 2012;55:1529-1537. doi: 10.1016/j.jvs.2012.03.016
- 456 20. Greenwald AG, Poehlman TA, Uhlmann EL, Banaji MR. Understanding and using the  
457 Implicit Association Test: III. Meta-analysis of predictive validity. *J Pers Soc Psychol*.  
458 2009;97:17-41. doi: 10.1037/a0015575
- 459 21. Woo K, Siracuse JJ, Klingbeil K, Kraiss LW, Osborne NH, Singh N, Tan TW, Arya S, Banerjee  
460 S, Bonaca MP, et al. Society for Vascular Surgery appropriate use criteria for  
461 management of intermittent claudication. *J Vasc Surg*. 2022;76:3-22.e21. doi:  
462 10.1016/j.jvs.2022.04.012
- 463 22. Conte M, Pomposelli F, Clair D, Geraghty P, McKinsey J, Mills J, Moneta G, Murad M,  
464 Powell R, Reed A, et al. Society for vascular surgery practice guidelines for  
465 atherosclerotic occlusive disease of the lower extremities: Management of  
466 asymptomatic disease and claudication. *Journal of vascular surgery*. 2015;61:2s-41s.
- 467 23. Sorber R, Dun C, Kawaji Q, Abularrage CJ, Black JH, 3rd, Makary MA, Hicks CW. Reprint  
468 of: Early peripheral vascular interventions for claudication are associated with higher  
469 rates of late interventions and progression to chronic limb threatening ischemia. *J Vasc*  
470 *Surg*. 2023;77:1720-1731.e1723. doi: 10.1016/j.jvs.2023.04.023
- 471 24. Bates D, Mächler M, Bolker B, Walker S. Fitting linear mixed-effects models Using lme4. *J*  
472 *Stat Softw [Internet]*. 2015;67.
- 473 25. Hagiwara N, Penner LA, Gonzalez R, Eggly S, Dovidio JF, Gaertner SL, West T, Albrecht TL.  
474 Racial attitudes, physician-patient talk time ratio, and adherence in racially discordant  
475 medical interactions. *Soc Sci Med*. 2013;87:123-131. doi:  
476 10.1016/j.socscimed.2013.03.016
- 477 26. Penner LA, Dovidio JF, Gonzalez R, Albrecht TL, Chapman R, Foster T, Harper FWK,  
478 Hagiwara N, Hamel LM, Shields AF, et al. The Effects of Oncologist Implicit Racial Bias in  
479 Racially Discordant Oncology Interactions. *Journal of Clinical Oncology*. 2016;34:2874-  
480 2880. doi: 10.1200/jco.2015.66.3658

- 481 27. Haider AH, Schneider EB, Sriram N, Dossick DS, Scott VK, Swoboda SM, Losonczy L, Haut  
482 ER, Efron DT, Pronovost PJ, et al. Unconscious race and social class bias among acute care  
483 surgical clinicians and clinical treatment decisions. *JAMA Surg.* 2015;150:457-464. doi:  
484 10.1001/jamasurg.2014.4038
- 485 28. Haider AH, Schneider EB, Sriram N, Scott VK, Swoboda SM, Zogg CK, Dhiman N, Haut ER,  
486 Efron DT, Pronovost PJ, et al. Unconscious Race and Class Biases among Registered  
487 Nurses: Vignette-Based Study Using Implicit Association Testing. *J Am Coll Surg.*  
488 2015;220:1077-1086 e1073. doi: 10.1016/j.jamcollsurg.2015.01.065
- 489 29. Imparato AM, Kim GE, Davidson T, Crowley JG. Intermittent claudication: its natural  
490 course. *Surgery.* 1975;78:795-799.
- 491 30. Conte MS, Pomposelli FB, Clair DG, Geraghty PJ, McKinsey JF, Mills JL, Moneta GL, Murad  
492 MH, Powell RJ, Reed AB, et al. Society for Vascular Surgery practice guidelines for  
493 atherosclerotic occlusive disease of the lower extremities: management of  
494 asymptomatic disease and claudication. *J Vasc Surg.* 2015;61:2s-41s. doi:  
495 10.1016/j.jvs.2014.12.009
- 496 31. Haqqani MH, Alonso A, Kobzeva-Herzog A, Farber A, King EG, Meltzer AJ, Eslami MH,  
497 Garg K, Rybin D, Siracuse JJ. Variations in Practice Patterns for Peripheral Vascular  
498 Interventions Across Clinical Settings. *Ann Vasc Surg.* 2023. doi:  
499 10.1016/j.avsg.2023.01.010
- 500 32. Dun C, Stonko D, Bose S, Keegan A, McDermott K, Rumalla K, Black J, Kalbaugh C, Makary  
501 M, Hicks C. Trends and factors associated with peripheral vascular interventions for the  
502 treatment of claudication from 2011-2022: a national Medicare cohort study. *Journal of*  
503 *the American Heart Association.* 2024 (in press, JAHA).
- 504 33. Brown T, Forster RB, Cleanthis M, Mikhailidis DP, Stansby G, Stewart M. Cilostazol for  
505 intermittent claudication. *Cochrane Database Syst Rev.* 2021;6:CD003748. doi:  
506 10.1002/14651858.CD003748.pub5
- 507 34. Cykert S, Eng E, Manning MA, Robertson LB, Heron DE, Jones NS, Schaal JC, Lightfoot A,  
508 Zhou H, Yongue C, et al. A Multi-faceted Intervention Aimed at Black-White Disparities in  
509 the Treatment of Early Stage Cancers: The ACCURE Pragmatic Quality Improvement trial.  
510 *J Natl Med Assoc.* 2020;112:468-477. doi: 10.1016/j.jnma.2019.03.001
- 511 35. Cykert S, Eng E, Walker P, Manning MA, Robertson LB, Arya R, Jones NS, Heron DE. A  
512 system-based intervention to reduce Black-White disparities in the treatment of early  
513 stage lung cancer: A pragmatic trial at five cancer centers. *Cancer Med.* 2019;8:1095-  
514 1102. doi: 10.1002/cam4.2005
- 515 36. Oswald FL, Mitchell G, Blanton H, Jaccard J, Tetlock PE. Predicting ethnic and racial  
516 discrimination: a meta-analysis of IAT criterion studies. *J Pers Soc Psychol.* 2013;105:171-  
517 192. doi: 10.1037/a0032734
- 518 37. Blanton H, Jaccard J. Arbitrary metrics in psychology. *Am Psychol.* 2006;61:27-41. doi:  
519 10.1037/0003-066x.61.1.27
- 520  
521  
522  
523  
524

525  
526

*Table 1. Physician Characteristics Across Implicit Bias Categories*

| <b>Characteristic</b>            | <b>Pro-Black Bias,<br/>N = 23<sup>1</sup></b> | <b>No Bias,<br/>N = 38<sup>1</sup></b> | <b>Pro-White Bias,<br/>N = 157<sup>1</sup></b> | <b>p-value<sup>2</sup></b> |
|----------------------------------|-----------------------------------------------|----------------------------------------|------------------------------------------------|----------------------------|
| Age                              | 47 (11)                                       | 44 (7)                                 | 46 (10)                                        | 0.7                        |
| Male                             | 14 (64%)                                      | 31 (82%)                               | 115 (74%)                                      | 0.3                        |
| Specialty                        |                                               |                                        |                                                | 0.9                        |
| <i>Cardiothoracic Surgery</i>    | 0 (0%)                                        | 0 (0%)                                 | 1 (0.6%)                                       |                            |
| <i>Interventional Cardiology</i> | 1 (4.3%)                                      | 2 (5.3%)                               | 7 (4.5%)                                       |                            |
| <i>Interventional Radiology</i>  | 1 (4.3%)                                      | 1 (2.6%)                               | 7 (4.5%)                                       |                            |
| <i>Vascular Surgery</i>          | 21 (91%)                                      | 35 (92%)                               | 142 (90%)                                      |                            |
| Years of Experience              |                                               |                                        |                                                | -                          |
| <i>0-2 years</i>                 | 2 (8.7%)                                      | 0 (0%)                                 | 19 (12.1%)                                     |                            |
| <i>3-5 years</i>                 | 6 (26%)                                       | 8 (21%)                                | 24 (15%)                                       |                            |
| <i>6-10 years</i>                | 4 (17%)                                       | 18 (47%)                               | 44 (28%)                                       |                            |
| <i>11-15 years</i>               | 2 (8.7%)                                      | 6 (16%)                                | 23 (15%)                                       |                            |
| <i>16-20 years</i>               | 2 (8.7%)                                      | 3 (7.9%)                               | 10 (6.4%)                                      |                            |
| <i>21-25 years</i>               | 3 (13%)                                       | 0 (0%)                                 | 18 (11%)                                       |                            |
| <i>26+ years</i>                 | 4 (17.3%)                                     | 3 (7.9%)                               | 19 (12.1%)                                     |                            |
| Race Ethnicity                   |                                               |                                        |                                                | <b>0.046*</b>              |
| <i>Non-Hispanic White</i>        | 14 (61%)                                      | 20 (53%)                               | 110 (70%)                                      |                            |
| <i>Non-Hispanic Black</i>        | 3 (13%)                                       | 3 (7.9%)                               | 4 (2.5%)                                       |                            |
| <i>Non-Hispanic Other</i>        | 4 (17%)                                       | 14 (37%)                               | 37 (24%)                                       |                            |
| <i>Hispanic</i>                  | 2 (8.7%)                                      | 1 (2.6%)                               | 6 (3.8%)                                       |                            |
| Region                           |                                               |                                        |                                                | 0.7                        |
| <i>Midwest</i>                   | 2 (8.7%)                                      | 9 (24%)                                | 34 (22%)                                       |                            |
| <i>Northeast</i>                 | 6 (26%)                                       | 7 (18%)                                | 41 (26%)                                       |                            |
| <i>South</i>                     | 11 (48%)                                      | 18 (47%)                               | 61 (39%)                                       |                            |
| <i>West</i>                      | 4 (17%)                                       | 4 (11%)                                | 21 (13%)                                       |                            |

<sup>1</sup>n (%); Mean (SD)

<sup>2</sup>Fisher's exact test; Kruskal-Wallis rank sum test; Pearson's Chi-squared test

527  
528  
529  
530  
531  
532  
533  
534  
535  
536  
537  
538  
539  
540  
541  
542  
543

544 *Table 2. Patient Characteristics Overall and by Patient Race*

| <b>Characteristic</b> | <b>Overall</b><br>N = 6,588 <sup>1</sup> | <b>White</b><br>N = 5,399 <sup>1</sup> | <b>Black</b><br>N = 1,189 <sup>1</sup> | <b>p-value</b> <sup>2</sup> |
|-----------------------|------------------------------------------|----------------------------------------|----------------------------------------|-----------------------------|
| Age                   | 67 (10)                                  | 67 (10)                                | 65 (10)                                | <0.001                      |
| BMI                   | 28.4 (6.0)                               | 28.4 (5.9)                             | 28.3 (6.4)                             | 0.4                         |
| Male                  | 4,335 (66%)                              | 3,687 (68%)                            | 648 (54%)                              | <0.001                      |
| Current Smoker        | 2,635 (40%)                              | 2,110 (39%)                            | 525 (44%)                              | 0.001                       |
| Diabetes              | 2,826 (43%)                              | 2,222 (41%)                            | 604 (51%)                              | <0.001                      |
| Below Knee            | 880 (14%)                                | 661 (13%)                              | 219 (19%)                              | <0.001                      |

<sup>1</sup>Mean(SD); n (%)

<sup>2</sup>Wilcoxon rank sum test; Pearson's Chi-squared test

545

546 *Table 3. Odds of a Below-Knee Procedure Among Patients with Claudication*

| <i>Predictors</i>                 | <b>Unadjusted</b>  |                  |                  | <b>Adjusted</b>    |                  |                  |
|-----------------------------------|--------------------|------------------|------------------|--------------------|------------------|------------------|
|                                   | <i>Odds Ratios</i> | <i>CI</i>        | <i>p</i>         | <i>Odds Ratios</i> | <i>CI</i>        | <i>p</i>         |
| (Intercept)                       | 0.13               | 0.09 – 0.18      | <b>&lt;0.001</b> | 0.16               | 0.07 – 0.34      | <b>&lt;0.001</b> |
| No Bias                           |                    | <i>Reference</i> |                  |                    | <i>Reference</i> |                  |
| Pro-White Bias                    | 1.12               | 0.78 – 1.60      | 0.537            | 1.12               | 0.77 – 1.63      | 0.546            |
| White Patient Race                |                    | <i>Reference</i> |                  |                    | <i>Reference</i> |                  |
| Black Patient Race                | 1.30               | 0.88 – 1.91      | 0.185            | 1.36               | 0.92 – 2.01      | 0.129            |
| No Bias*Black Patient Race        |                    | <i>Reference</i> |                  |                    | <i>Reference</i> |                  |
| Pro-White Bias*Black Patient Race | 1.42               | 0.91 – 2.19      | 0.119            | 1.59               | 1.02 – 2.49      | <b>0.040</b>     |

547 Adjusted for physician race, year, patient gender, patient smoking status, diabetes status, and patient age

548

549

550 *Table 4. Odds of 1-Year Amputation Associated with Patient Race Stratified by Implicit Bias*  
 551 *Category, among patients with claudication*

| <i>Predictors</i>  | <b>No Bias</b>     |                  |              | <b>Pro-White Bias</b> |                  |                  |
|--------------------|--------------------|------------------|--------------|-----------------------|------------------|------------------|
|                    | <i>Odds Ratios</i> | <i>CI</i>        | <i>p</i>     | <i>Odds Ratios</i>    | <i>CI</i>        | <i>p</i>         |
| (Intercept)        | 0.00               | 0.00 – 0.14      | <b>0.004</b> | 0.05                  | 0.00 – 0.59      | <b>0.017</b>     |
| White Patient Race |                    | <i>Reference</i> |              |                       | <i>Reference</i> |                  |
| Black Patient Race | 1.28               | 0.34 – 4.87      | 0.716        | 3.04                  | 1.68 – 5.51      | <b>&lt;0.001</b> |

552 Adjusted for physician race, year, patient gender, patient smoking status, diabetes status, and patient age

553

554

555 *Table 5. Odds of 1-Year Amputation Associated with Below-Knee Procedures Stratified by*  
 556 *Implicit Bias Category, among patients with claudication*

| <i>Predictors</i> | <b>No Bias</b>     |                  |              | <b>Pro-White Bias</b> |                  |                  |
|-------------------|--------------------|------------------|--------------|-----------------------|------------------|------------------|
|                   | <i>Odds Ratios</i> | <i>CI</i>        | <i>p</i>     | <i>Odds Ratios</i>    | <i>CI</i>        | <i>p</i>         |
| (Intercept)       | 0.00               | 0.00 – 0.08      | <b>0.002</b> | 0.03                  | 0.00 – 0.49      | <b>0.013</b>     |
| Above-Knee        |                    | <i>Reference</i> |              |                       | <i>Reference</i> |                  |
| Below-Knee        | 4.20               | 1.52 – 11.60     | <b>0.004</b> | 6.94                  | 3.86 – 12.49     | <b>&lt;0.001</b> |

557 Adjusted for physician race, year, patient gender, patient smoking status, diabetes status, and patient age

558



Figure 1. Interaction Contrasts from the Adjusted Below-Knee Procedure Model

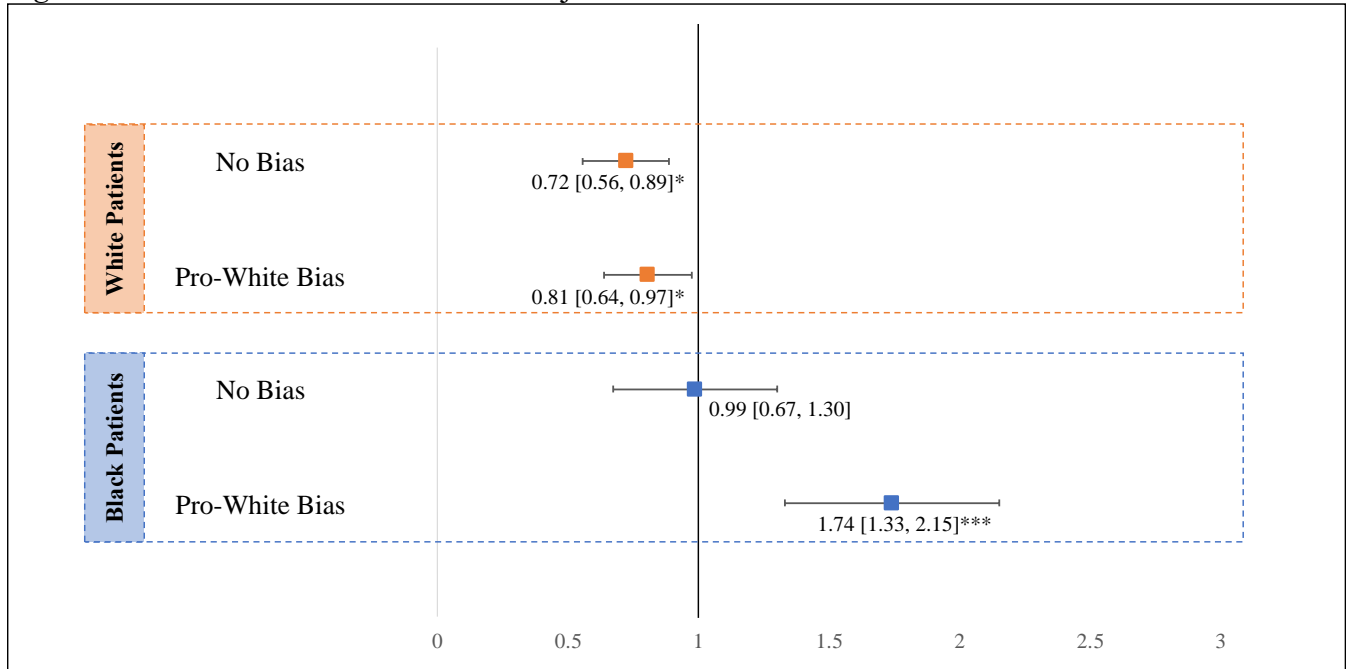

Figure 2. Conceptual Model Illustrating the Moderating Effect of Physician Implicit Bias on Amputation Outcomes Among Black Patients with Claudication

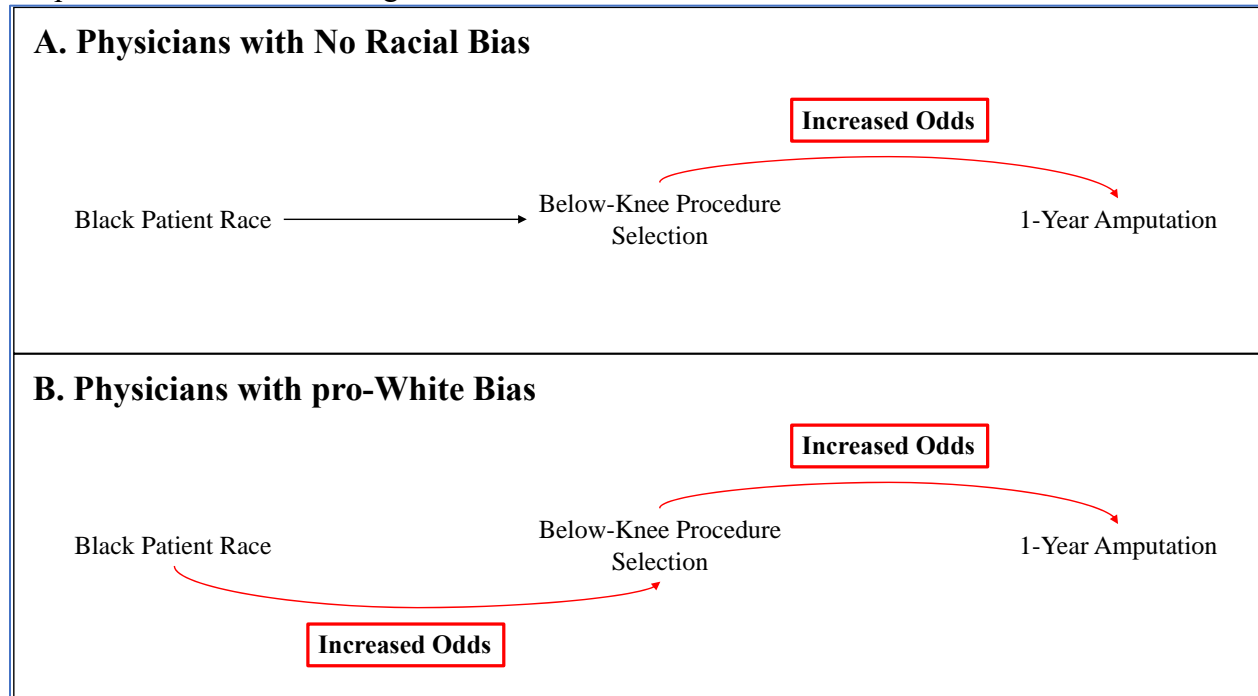

Source: https://medrxiv.org/content/10.1101/2024.02.13.24302798v1.full.pdf
